# Supplementary material
Source: MDPI journal article supplement (https://www.mdpi.com/2410-3888/8/6/309)
Supplement: s1 [file s1]

## Supplementary tables

Table S1. The specific primers for RT-PCR.

| Gene           | Primers       | Sequences (5'- 3')       |
|----------------|---------------|--------------------------|
| <i>myh1</i>    | RT-MYH1_F     | TCAAGCAGAAGCAGCGTGAGGAG  |
|                | RT-MYH1_R     | CGGATAGCACAGAGCCTTCAGCAT |
| <i>myh4</i>    | RT-MYH4_F     | TGATGCCAAGAGTGCCTGCTACG  |
|                | RT-MYH4_R     | CTGTCCTCTCCTCCTGAGTGTCCA |
| <i>gtr12</i>   | RT-GTR12_F    | ACCTGCTCATCTCCATGACCTTCC |
|                | RT-GTR12_R    | TATCTCCTCCAGCGTGCGACCT   |
| <i>tri16</i>   | RT-TRI16_F    | CGCACAAGCACACTCATCACAAGA |
|                | RT-TRI16_R    | TCATATGGTGGCGGCTTCACTTCT |
| <i>crem</i>    | RT-CREM_F     | ATAACGCCAGCTCCAGCCTTCC   |
|                | RT-CREM_R     | CGGGCAGCTTCCCTGTTCTTCA   |
| <i>ttc9a</i>   | RT-TTC9A_F    | TGGAGAATGCAGAGCTGGAGTGTT |
|                | RT-TTC9A_R    | CGGATCGGTACAGAGCCTTGAAGT |
| <i>jun</i>     | RT-JUN_F      | CTCTCCTGATGTGGGCTTGCTGAA |
|                | RT-JUN_R      | CTCCTGCTCGTCGGTGACATTCTT |
| <i>tri65</i>   | RT-TRI65_F    | CCAGCAGAGAATCCAGGACAGAGA |
|                | RT-TRI65_R    | TCCATCAGACGGATCAGGTCAGTG |
| <i>fmo5</i>    | RT-FMO5_F     | CGGTGGTTGGAGGAGGAAGTTCAG |
|                | RT-FMO5_R     | AATGCTCGCTCTGTCTGGCTCTG  |
| <i>b3gt2</i>   | RT-B3GT2_F    | GGCGGGTGTCTTACTCCAGTTGT  |
|                | RT-B3GT2_R    | AGGCGTTGTGCTTGTGCTCTG    |
| <i>tnni2</i>   | RT-TNNI2_F    | CGACAAGGTGGACGAGGAGAGGTA |
|                | RT-TNNI2_R    | AGCATGGAGTCAGCGGACATACG  |
| <i>pprc1</i>   | RT-PPRC1_F    | ACCGCTGCTACTGTGTCTGCTC   |
|                | RT-PPRC1_R    | GGTGAGGGTTTGGTGGACTTGCTA |
| <i>ghr</i>     | RT-GLIS1_F    | GCAGCAAGGATGTCTGTACGGAGA |
|                | RT-GLIS1_R    | AGAGTGAGAGGCGGACGGAGTT   |
| <i>ptgis</i>   | RT-PTGIS_F    | TCTGGCAGCAGTGAAGAAGGAGTT |
|                | RT-PTGIS_R    | GCAGCGGTGAGTCTGAGTGTCT   |
| <i>sdhb</i>    | RT-SDHB_F     | GCTGTCCTGTCTGTTCTGTTGTGG |
|                | RT-SDHB_R     | CCGAACCATCACCATCATGCCAGA |
| <i>stc2</i>    | RT-STC2_F     | GAAGTGTGGAGACGAGGTCAGGTT |
|                | RT-STC2_R     | GTGGCTGTGGATTGCTGTGGAAG  |
| <i>nr4a1</i>   | RT-NR4A1_F1   | CCTTGGTGGGAAATGGCTATGTGG |
|                | RT-NR4A1_R1   | GCTACTGCGTTGTGGCTGAATGAA |
| <i>nr4a1_1</i> | RT-NR4A1_1_F2 | AACGCCTCCTGTCAGCACTACG   |
|                | RT-NR4A1_1_R2 | CGATTCCGCCTCCTCTTGTCCA   |
| <i>pde4d</i>   | RT-PDE4D_F    | CTCCATCTCAGCCGACAAGTTCCA |
|                | RT-PDE4D_R    | TACTGCCACTGTAGCCCTCCTCTT |
| <i>s41a1</i>   | RT-S41A1_F    | CGGAGATCGTGGTGGCATTGGA   |

|              |            |                          |
|--------------|------------|--------------------------|
| <i>pdp1</i>  | RT-S41A1_R | TCATCACTCTCGTTGCTCTGGCTT |
|              | RT-PDP1_F  | CGAGCCAGAGATCACGTACCACAA |
|              | RT-PDP1_R  | CCACGATACGAACCACCTCCTGTC |
| <i>tutla</i> | RT-TUTLA_F | TGGCTCATCCTCAGCAGCAACAT  |
|              | RT-TUTLA_R | ACATTGACAGACTCGCTCGGTTCA |
| <i>klf13</i> | RT-KLF13_F | TGGCAAATCATCCACCTCAAAGC  |
|              | RT-KLF13_R | CGGAGCGGGCGAACTTCTTACT   |
| <i>htr1a</i> | RT-HTR1A_F | CGGCTGGCATCTCCTTCGCTAT   |
|              | RT-HTR1A_R | CGCTGGAGTGAGAGTCATCATCCT |
| <i>mxra5</i> | RT-MXRA5_F | GGCTCCAAGGTAGAGGCACCATAC |
|              | RT-MXRA5_R | GCAGGACAGCAAGGTCTCCATCA  |
| <i>actb</i>  | RT-actb-F  | GATCTGGCATCACACCTTCTAC   |
|              | RT-actb-R  | CACCGGAGTCCATGACAATAC    |

Table S2. Summary of transcriptome data generated from the brown-marbled grouper samples.

| Sample | Total reads | Unmapped reads | Unique mapped reads | Unique mapped rate | Multiple mapped reads | Multiple mapped ratios | Mapping ratios |
|--------|-------------|----------------|---------------------|--------------------|-----------------------|------------------------|----------------|
| H1     | 52,012,402  | 1,527,697      | 50,143,406          | 96.46%             | 311,300               | 0.60%                  | 97.06%         |
| H2     | 63,030,193  | 1,156,861      | 61,217,878          | 97.12%             | 655,454               | 1.04%                  | 98.16%         |
| H3     | 53,917,347  | 1,015,204      | 52,382,921          | 97.15%             | 419,222               | 0.78%                  | 97.93%         |
| L1     | 51,476,226  | 943,598        | 50,292,002          | 97.70%             | 240,626               | 0.47%                  | 98.17%         |
| L2     | 65,202,821  | 1,307,107      | 63,538,208          | 97.45%             | 357,506               | 0.55%                  | 98.00%         |
| L3     | 68,502,049  | 1,377,230      | 66,770,737          | 97.47%             | 354,082               | 0.52%                  | 97.99%         |

# Supplementary figures

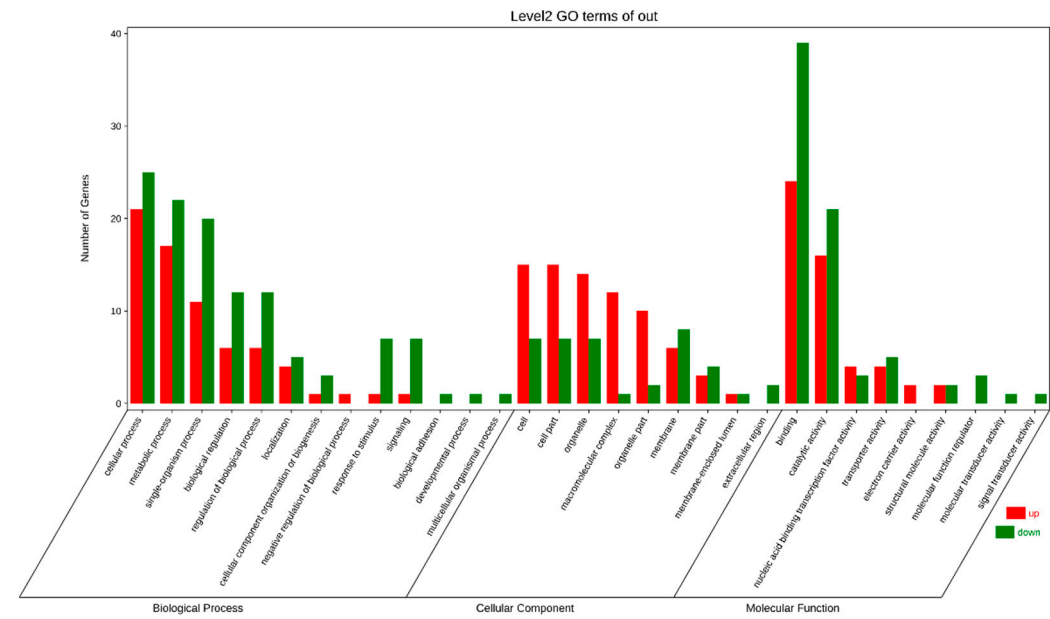

Fig. S1. GO assignment of the differentially expressed genes. Red bar indicates up-regulated genes, and green bar indicates down-regulated genes.

A Top 20 of GO Enrichment (Biological Process)

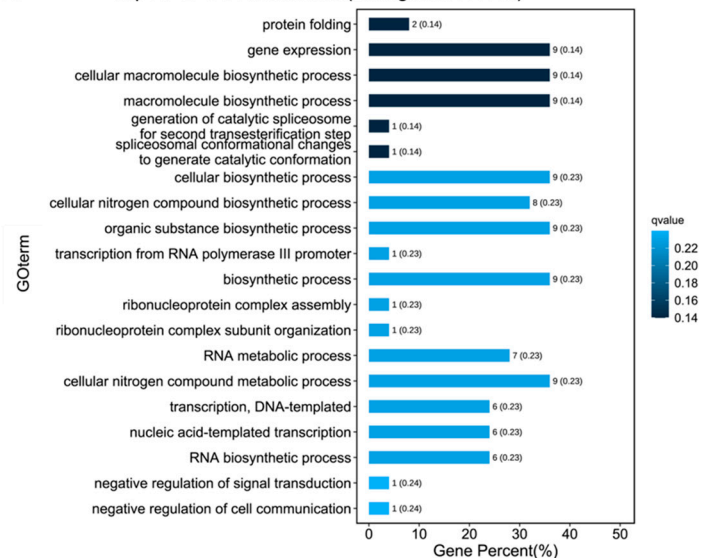

B Top 20 of GO Enrichment (Cellular Component)

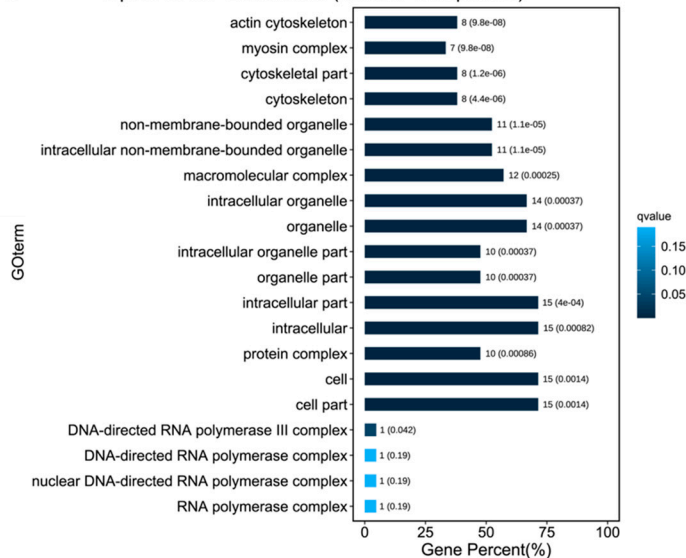

C Top 20 of GO Enrichment (Molecular Function)

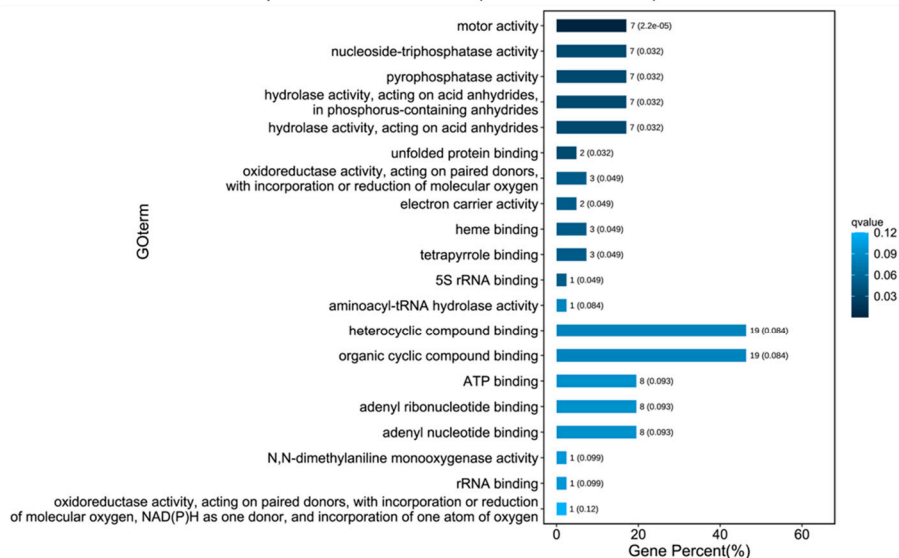

Fig.S2 Bar plots of down-regulated genes in fast-growing grouper of GO functional enrichment analyses. A: Top 20 of GO Enrichment (Biological Process); B: Top 20 of GO Enrichment (Cellular Component); C: Top 20 of GO Enrichment (Molecular Function).

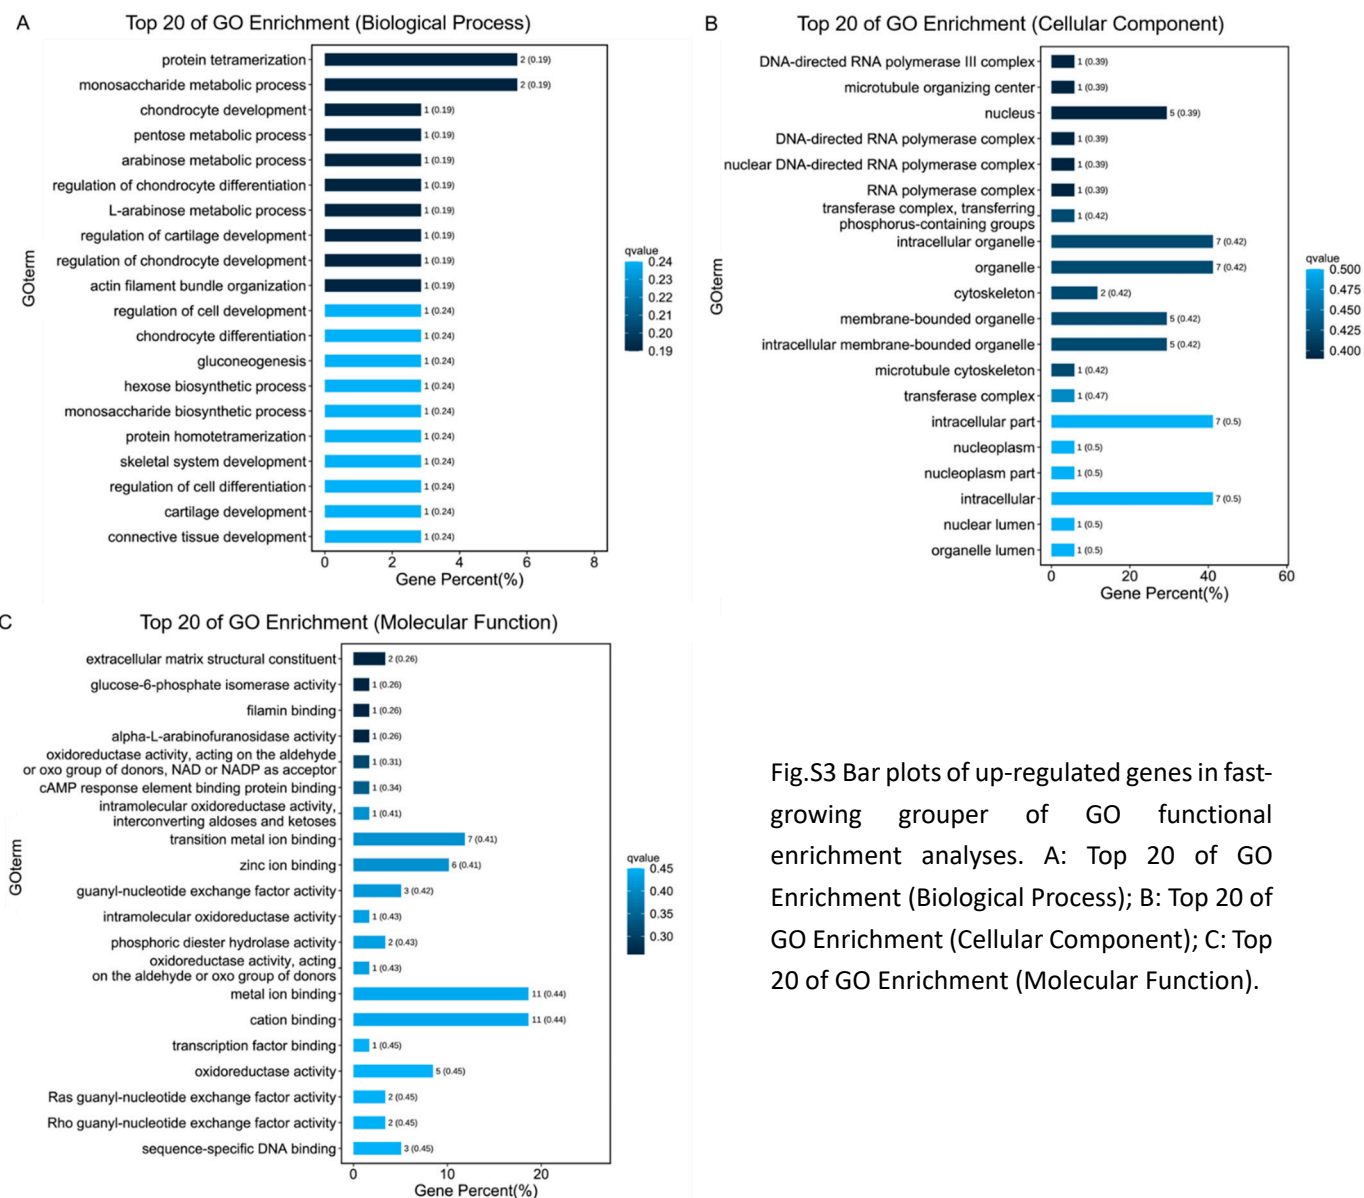

Fig.S3 Bar plots of up-regulated genes in fast-growing grouper of GO functional enrichment analyses. A: Top 20 of GO Enrichment (Biological Process); B: Top 20 of GO Enrichment (Cellular Component); C: Top 20 of GO Enrichment (Molecular Function).

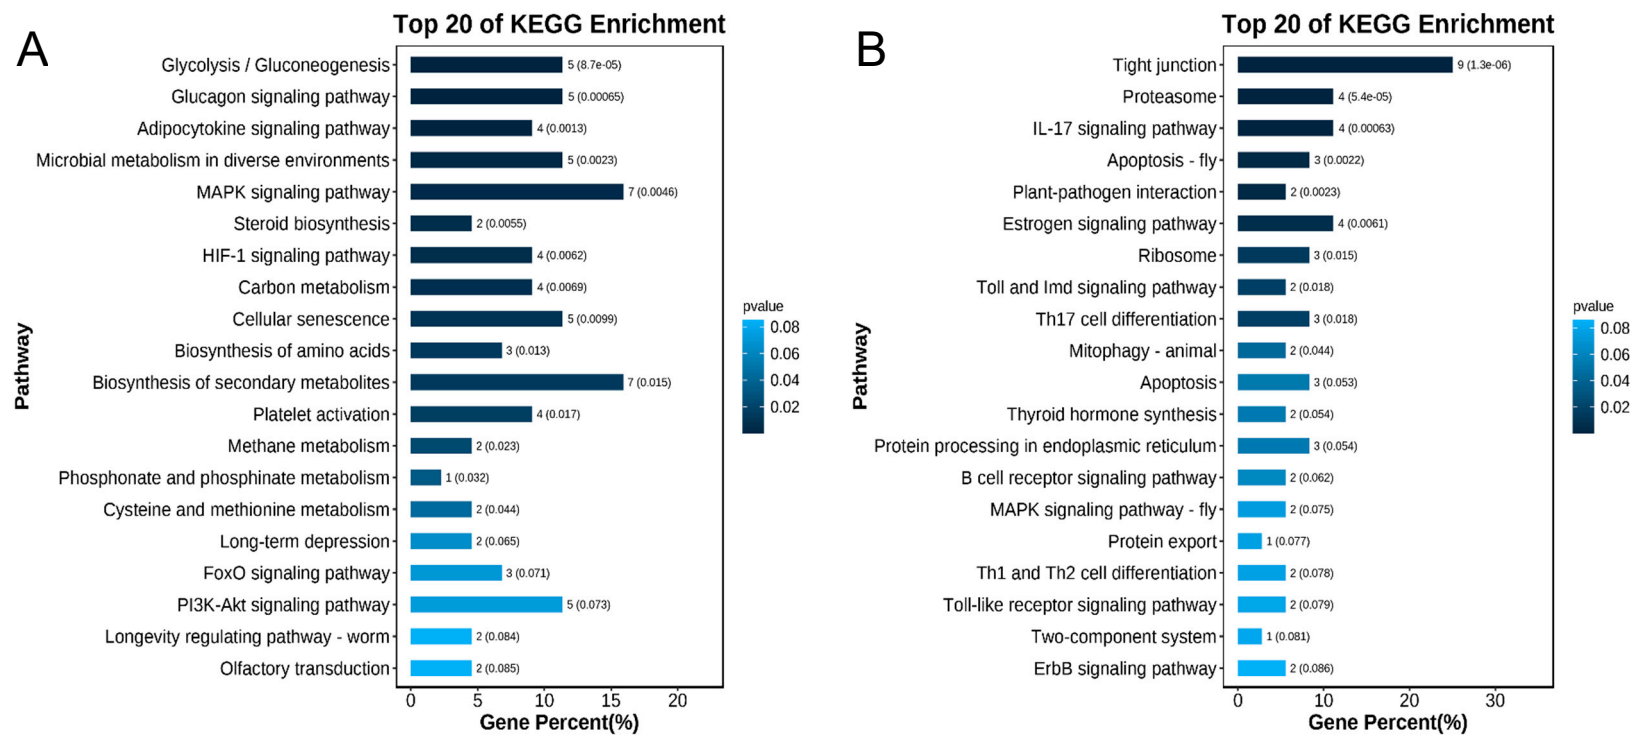

Fig.S4 A: Bar plot of up-regulated genes in the fast-growing group based on KEGG enrichment analyses. B: Bar plot of down-regulated genes in the fast-growing group based on KEGG enrichment analyses.

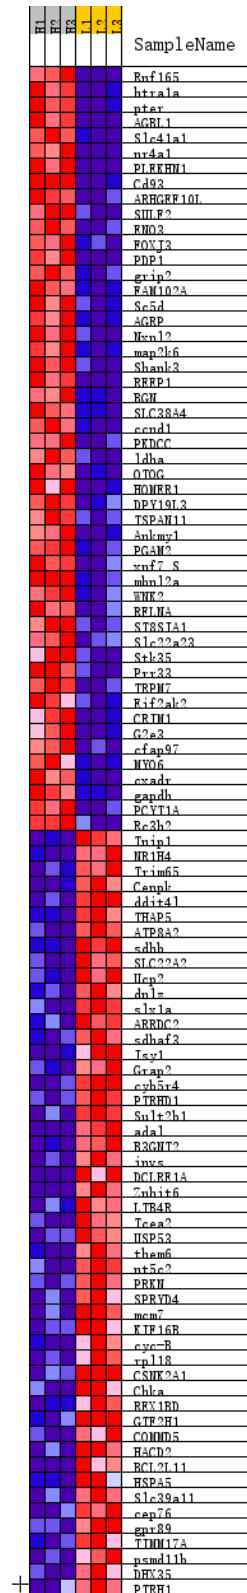

Fig. S5. Heat map of the top 50 features for each phenotype in the GSEA data. H1, H2, H3: the fast-growing group. L1, L2, L3: the slow-growing group. Red indicates up-regulated genes, and blue indicates down-regulated genes.

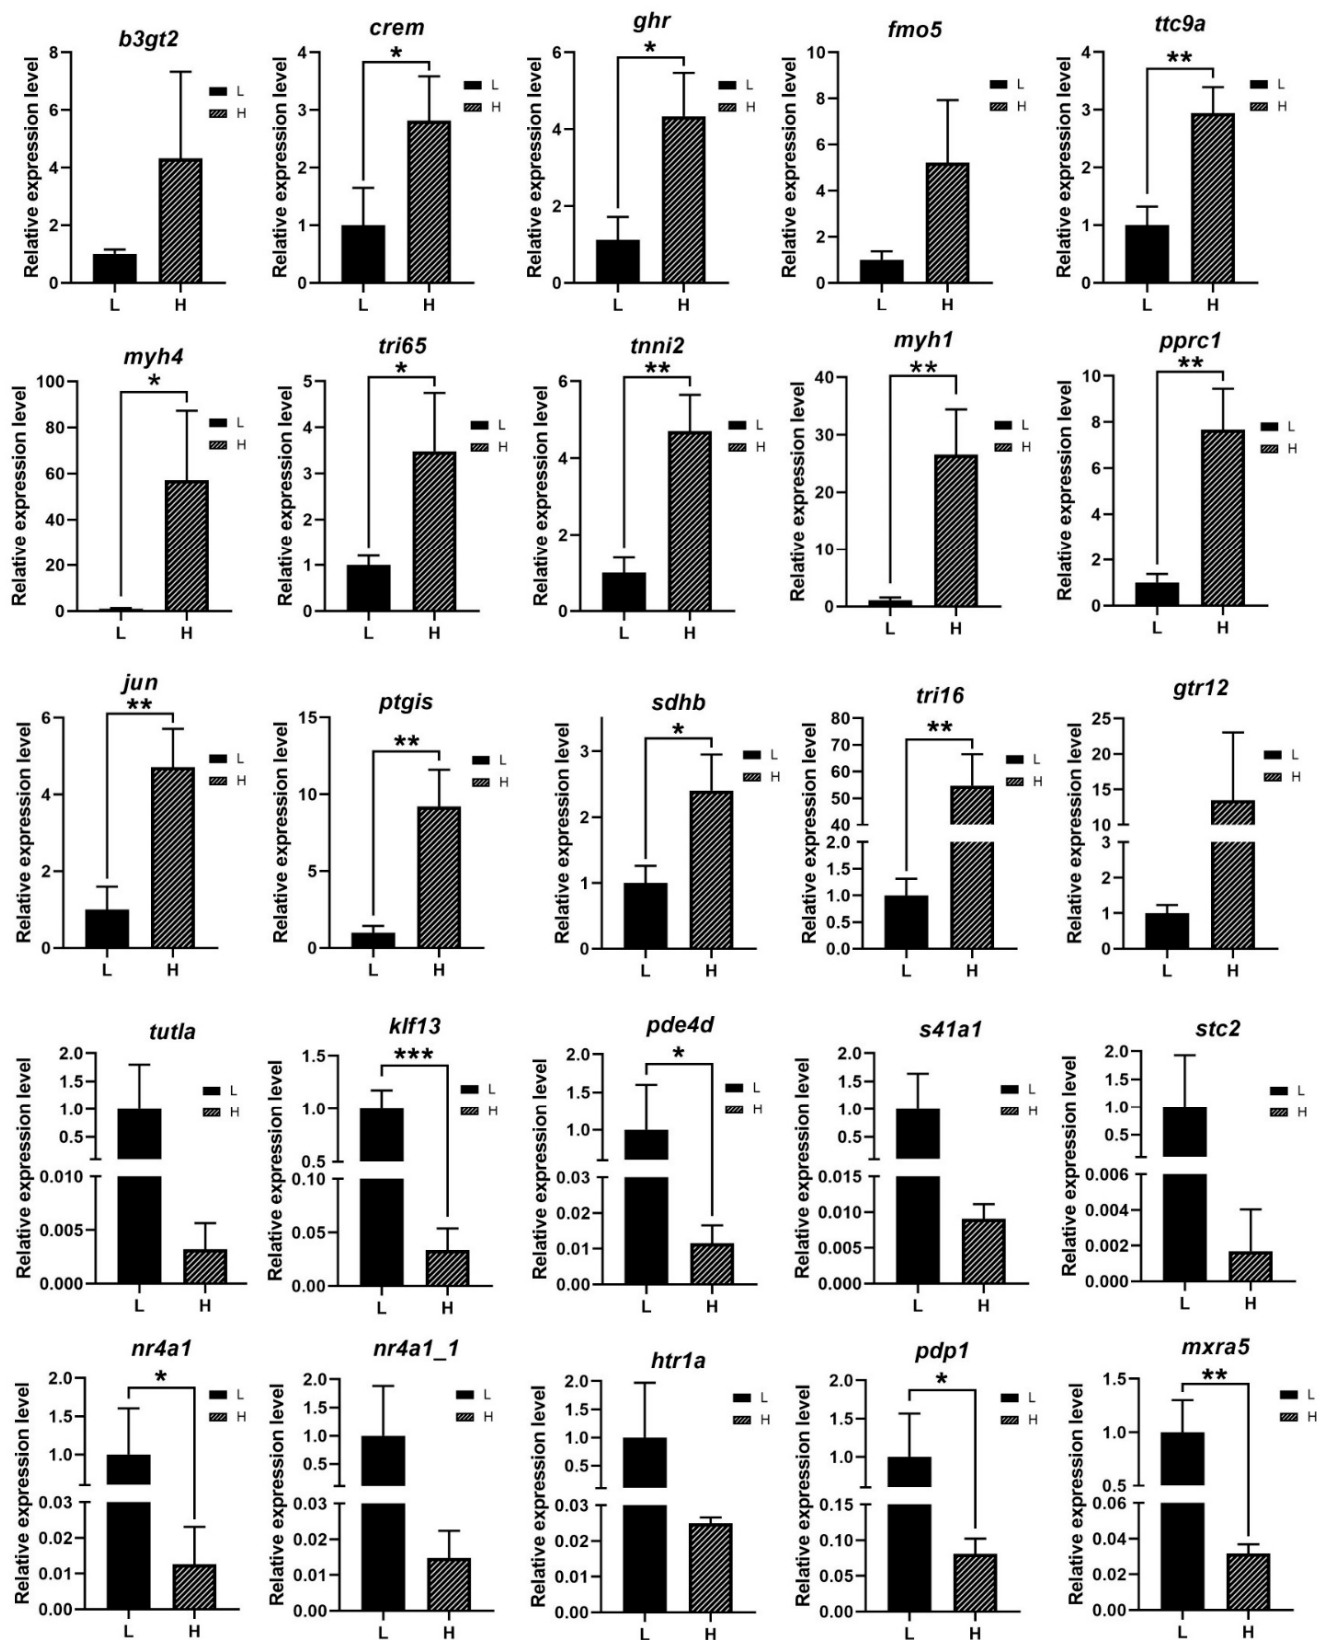

Fig. S6. L represent the slow-growing group; H represent the fast-growing group. The qPCR analysis of gene expression in the slow- and fast-growing groups. The y-axis indicates the relative expression level between the samples of the slow- and fast-



growing groups using the relative quantitation. *b3gt2*, hexosyltransferase; *crem*, cAMP-responsive element modulator; *ghr*, growth hormone receptor; *fmo5*, flavin-containing mono-oxygenase 5; *ttc9a*, tetratricopeptide repeat protein 9A; *myh4*, Myosin-4; *tri65*, tripartite motif-containing protein 65; *tnni2*, Troponin I, fast skeletal muscle; *myh1*, myosin-1; *pprc1*, peroxisome proliferator-activated receptor gamma coactivator-related protein 1; *jun*, transcription factor Jun; *ptgis*, prostacyclin synthase; *sdhb*, succinate dehydrogenase [ubiquinone] iron-sulfur subunit, mitochondrial; *tri16*, trichothecene 8-O-acetyltransferase; *gtr12*, solute carrier family 2, facilitated glucose transporter member 12; *tutla*, protein turtle homolog A; *klf13*, Kruppel-like factor 13; *pde4d*, cAMP-specific 3',5'-cyclic phosphodiesterase 4D; *s41a1*, solute carrier family 41 member 1; *stc2*, stanniocalcin-2; *nr4a1*, nuclear receptor subfamily 4 group A member 1; *htr1a*, 5-hydroxytryptamine receptor 1A; *pdp1*, PWWP domain-containing protein 1; *mxra5*, matrix-remodeling-associated protein 5. Significant differences at the  $P < 0.05$ ,  $P < 0.01$ ,  $P < 0.001$  levels are indicated by \*, \*\*, \*\*\* above the columns.
